# Supplementary material for: Comprehensive Network Analysis Identified SIRT7, NTRK2, and CHI3L1 as New Potential Markers for Intervertebral Disc Degeneration
Source: PubMed Central journal article supplement (PMC8858045; doi:10.1155/2022/4407541), 2022-02-12

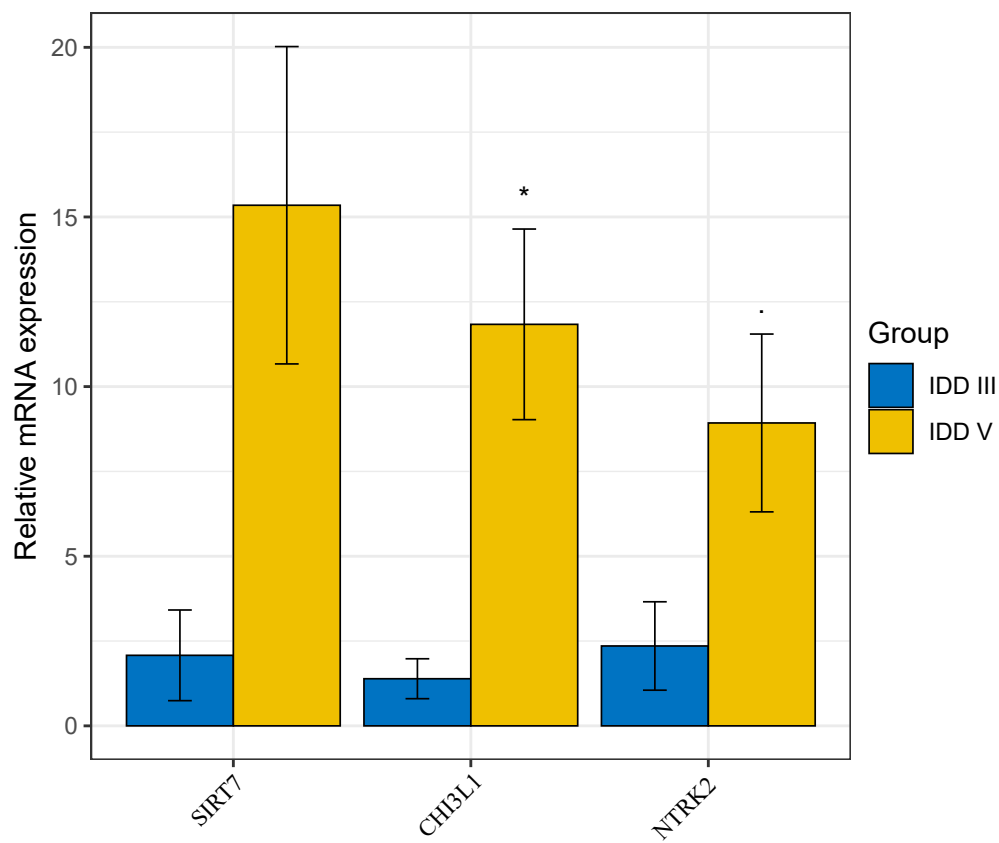

Supplement: 4407541.f1.pdf [file 4407541.f1.pdf]
